# Supplementary material for: Psychometric and clinical evaluation of schizophrenia remission criteria in outpatients with psychotic disorders
Source: Springer Nature journal article supplement (doi:10.1186/s12888-023-04701-3), 2023-03-28
Supplement: MOESM2 [file 25170412]

## Tests of normality of distributions

Age:

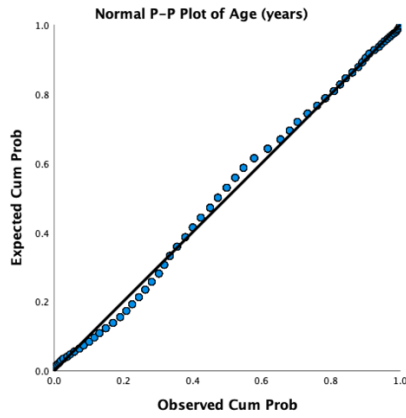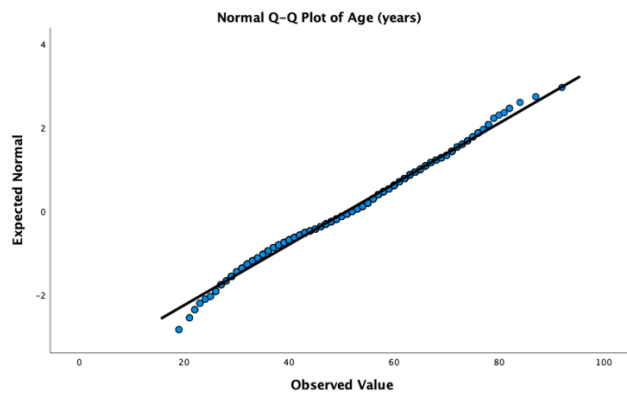

Skewness: -0.03  
Kurtosis: -0.56

BMI:

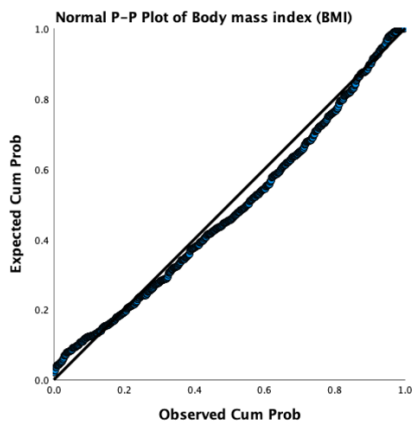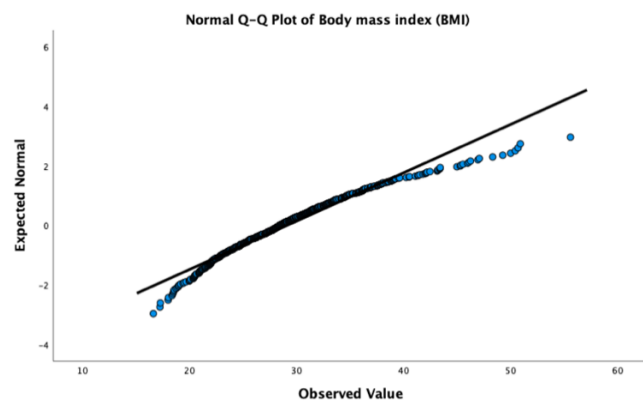

Skewness: 0.85  
Kurtosis: 1.12

PANSS-8 sum score:

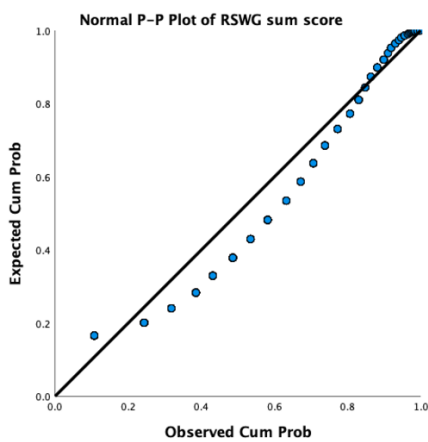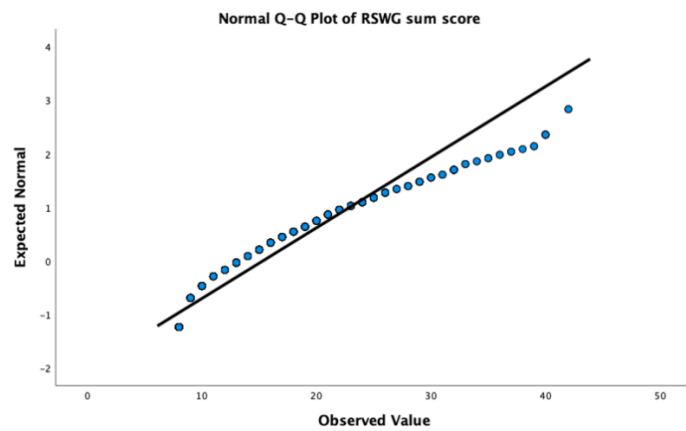

Skewness: 1.25  
Kurtosis: 1.18
