# Supplementary material for: Psychometric and clinical evaluation of schizophrenia remission criteria in outpatients with psychotic disorders
Source: Springer Nature journal article supplement (doi:10.1186/s12888-023-04701-3), 2023-03-28
Supplement: MOESM3 [file 25170412]

**Item score distributions of the PANSS-8 (N = 1744)**

| <b>Item</b>                                                                        | <b>Mean (SD<sup>a</sup>)</b> | <b>Median (range)</b> | <b>Floor<sup>b</sup></b> | <b>Ceiling<sup>c</sup></b> |
|------------------------------------------------------------------------------------|------------------------------|-----------------------|--------------------------|----------------------------|
| <b>P1 Delusions</b><br><i>(positive symptom, psychoticism)</i>                     | 2.37 (1.65)                  | 2 (1–7)               | 47%                      | 1%                         |
| <b>G9 Unusual thought content</b><br><i>(general symptom, psychoticism)</i>        | 2.00 (1.38)                  | 1 (1–7)               | 56%                      | 1%                         |
| <b>P3 Hallucinatory behaviour</b><br><i>(positive symptom, psychoticism)</i>       | 1.99 (1.50)                  | 1 (1–7)               | 62%                      | 0%                         |
| <b>P2 Conceptual disorganization</b><br><i>(positive symptom, disorganization)</i> | 1.95 (1.33)                  | 1 (1–7)               | 56%                      | 0%                         |
| <b>G5 Mannerisms/Posturing</b><br><i>(general symptom, disorganization)</i>        | 1.59 (1.03)                  | 1 (1–7)               | 68%                      | 0%                         |
| <b>N1 Blunted affect</b><br><i>(negative symptom)</i>                              | 2.07 (1.29)                  | 2 (1–7)               | 48%                      | 0%                         |
| <b>N4 Social withdrawal</b><br><i>(negative symptom)</i>                           | 2.38 (1.54)                  | 2 (1–7)               | 42%                      | 1%                         |
| <b>N6 Lack of spontaneity</b><br><i>(negative symptom)</i>                         | 2.04 (1.38)                  | 1 (1–7)               | 53%                      | 0%                         |
| <b>Total score</b>                                                                 | 16.39 (7.76)                 | 15 (8–51)             | 16%                      | 0%                         |

<sup>b</sup>% of lowest possible score

<sup>c</sup>% of highest possible score

The sub-classification of items according to two different models (positive/negative/general symptoms or psychoticism/disorganization/negative symptoms) is indicated in parentheses.
